# Supplementary material for: A novel method for deriving the aerosol hygroscopicity parameter based only on measurements from a humidified nephelometer system
Source: Copernicus journal article supplement (doi:10.5194/acp-17-6651-2017), 2017-06-07
Supplement: Supplementary file 1 [file acp-17-6651-2017-supplement.pdf]

Supplement of Atmos. Chem. Phys., 17, 6651–6662, 2017  
<https://doi.org/10.5194/acp-17-6651-2017-supplement>  
© Author(s) 2017. This work is distributed under  
the Creative Commons Attribution 3.0 License.

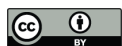

*Supplement of*

## **A novel method for deriving the aerosol hygroscopicity parameter based only on measurements from a humidified nephelometer system**

**Ye Kuang et al.**

*Correspondence to:* Chunsheng Zhao (zcs@pku.edu.cn)

The copyright of individual parts of the supplement might differ from the CC BY 3.0 License.

---

27 **1.1 Measurement sites**

28 Datasets from five field campaigns are used in this paper. These campaigns are  
29 conducted at four sites on the North China Plain (NCP) during different time periods.  
30 The four sites are Wangdu (WD), Xianghe (XH) and Gucheng (GC) in Hebei province  
31 and Wuqing (WQ) in Tianjin, and their locations are shown in Fig.S1.

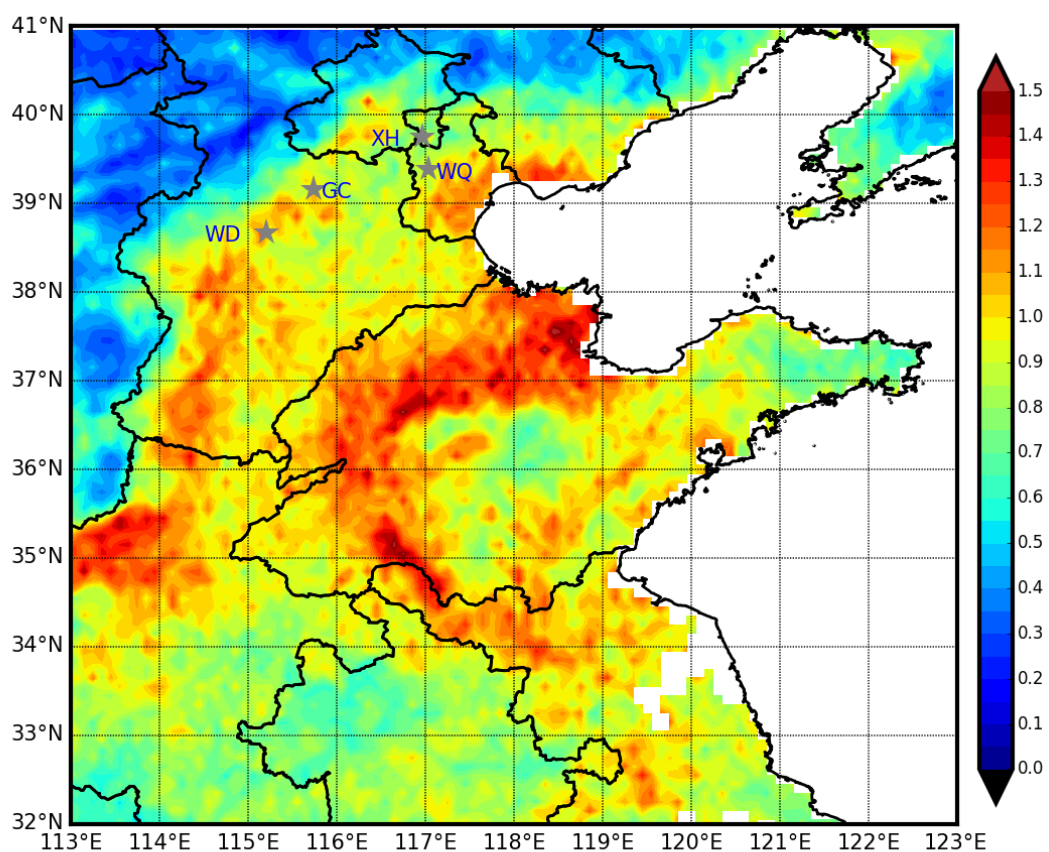

**Figure S1.** Locations of sites are marked with star markers. Colors represent average distribution of aerosol optical depth at 550 nm during summer from 2012 to 2014. The dataset of aerosol optical depth at 550 nm is from Moderate Resolution Imaging Spectroradiometer onboard satellite Aqua.

32 **1.2 Traditional way of deriving  $\kappa_{f(RH)}$  from  $f(RH)$  measurements**

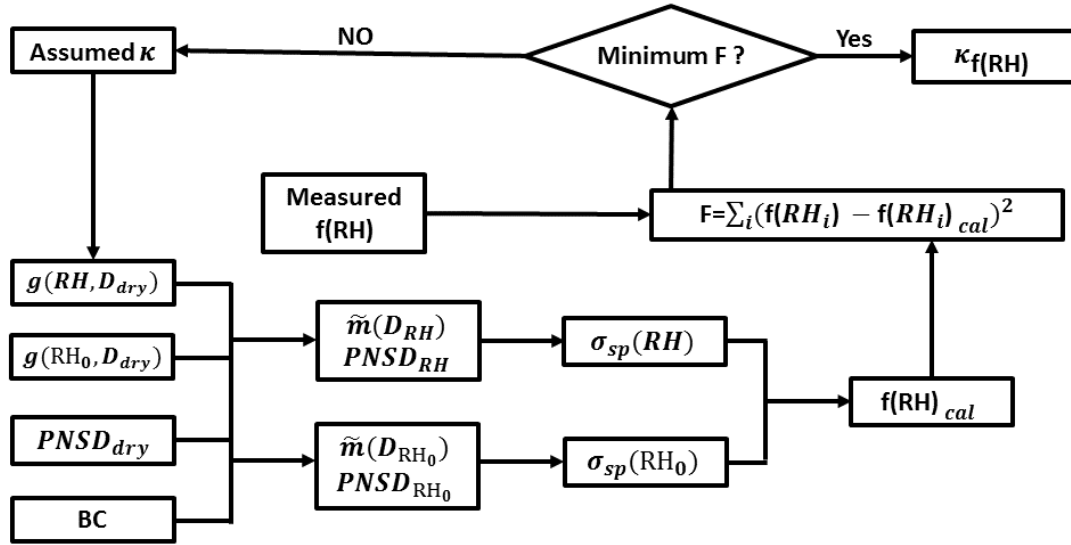

**Figure S2.** The flow chart of calculating  $\kappa_{f(RH)}$  with  $f(RH)$  measurements, PNSD and mass concentration of BC.

33 The flow chart of deriving  $\kappa_{f(RH)}$  from  $f(RH)$  measurements are shown in Fig.S2.

34 Mass concentration of BC is distributed to different particle diameters with a fixed mass

35 size distribution of BC which is provided by Ma et al. (2012). The  $\tilde{m}$  represents

36 refractive index.  $RH_0$  is the sample RH of the dry nephelometer. The  $\tilde{m}(D_{RH})$  can be

37 calculated using the following formula:  $\tilde{m}(D_{RH}) = f_{non-BC} \cdot \tilde{m}_{non-BC} + f_{BC} \cdot \tilde{m}_{BC} +$

38  $f_{water} \cdot \tilde{m}_{water}$ , where  $f_{non-BC}$ ,  $f_{BC}$  and  $f_{water}$  represent the volume fractions of

39 non-BC components, BC and water. Values of  $\tilde{m}_{non-BC}$ ,  $\tilde{m}_{BC}$  and  $\tilde{m}_{water}$  are

40 introduced in the manuscript.

41

42

43 Ma, N., Zhao, C. S., Müller, T., Cheng, Y. F., Liu, P. F., Deng, Z. Z., Xu, W. Y., Ran,

44 L., Nekat, B., van Pinxteren, D., Gnauk, T., Müller, K., Herrmann, H., Yan, P., Zhou,

45 X. J., and Wiedensohler, A.: A new method to determine the mixing state of light

46 absorbing carbonaceous using the measured aerosol optical properties and number

47 size distributions, Atmos. Chem. Phys., 12, 2381-2397, 10.5194/acp-12-2381-2012,

48 2012.

49
